# Supplementary material for: A modular strategy for engineering orthogonal chimeric RNA transcription regulators
Source: PubMed Central journal article supplement (PMC3753616; doi:10.1093/nar/gkt452), 2013-06-12
Supplement: supp_gkt452_nar-00666-r-2013-File009.pdf [file supp_gkt452_nar-00666-r-2013-File009.pdf]

**Supporting Data for:** A modular strategy for engineering orthogonal chimeric RNA transcription regulators

Melissa K. Takahashi<sup>1</sup> and Julius B. Lucks<sup>1\*</sup>

<sup>1</sup> School of Chemical and Biomolecular Engineering, Cornell University, Ithaca, NY, 14853, USA

\* To whom correspondence should be addressed. Tel: 1-607-255-3601; Fax: 1-607-255-9166; Email: jblucks@cornell.edu

## **Materials and Methods**

### **Flow cytometry**

Ten  $\mu\text{L}$  of cell culture from the *in vivo* gene expression assay was mixed with 500  $\mu\text{L}$  PBS and read on a BD FACSCalibur flow cytometer. Data for the following parameters were collected: forward scatter (FSC), side scatter (SSC), and GFP fluorescence (488 nm excitation, 530 nm emission). Data for at least 50,000 cellular counts were collected for each sample. Data for each plasmid combination were analyzed in matlab. Counts were first gated in FSC vs. SSC by choosing a window surrounding the largest cluster of cells. GFP values recorded in relative channel number (1-4096 corresponding to 12-bit data) for gated cells were then histogrammed in 500 bins. Histograms were converted into relative intensity values (0-10,000 for log4 mode acquisition) and plotted in Figure S9.

### **Induction curve assay**

All experiments were performed in *E. coli* strain TG1. Plasmid combinations were transformed into chemically competent *E. coli* TG1 cells, plated on Difco LB+Agar plates containing 100  $\mu\text{g}/\text{mL}$  carbenicillin and 34  $\mu\text{g}/\text{mL}$  chloramphenicol, and incubated overnight (approximately 17 hours (h)) at 37°C. Plates were taken out of the incubator and left at room temperature for approximately 7 h. Three colonies were used to separately inoculate 300  $\mu\text{L}$  of LB containing carbenicillin and chloramphenicol at the concentrations above in a 2 mL 96-well block (Costar 3960), and grown approximately 17 h overnight at 37°C at 1,000 rpm in a Labnet Vortemp 56 bench top shaker. 10  $\mu\text{L}$  of this overnight culture was then added to 190  $\mu\text{L}$  (1:20 dilution) of M9 minimal media (1xM9 minimal salts, 1 mM thiamine hydrochloride, 0.4% glycerol, 0.2% casamino acids, 2 mM  $\text{MgSO}_4$ , 0.1 mM  $\text{CaCl}_2$ ) containing the selective antibiotics and the required amount of IPTG. After 3 h incubation at 37C, 1,000 rpm in the Vortemp shaker, 20  $\mu\text{L}$  of this culture was diluted again into 180  $\mu\text{L}$  (1:10 dilution) of supplemented M9 minimal media with antibiotics and IPTG, and grown for 2.5 h at 37C, 1,000 rpm. 100  $\mu\text{L}$  of this culture was then transferred to a 96-well plate (Costar 3631) containing 100  $\mu\text{L}$  of phosphate buffered saline (PBS). Fluorescence (485 nm excitation, 528 nm emission) and optical density (OD, 600 nm) were then measured using a Biotek SynergyHT plate reader.

### **mRFP *in vivo* gene expression assay**

Transformation and growth was performed according the methods for the *in vivo* gene expression assay outlined in the main text. Fluorescence (560 nm excitation, 630 nm emission) and optical density (OD, 600 nm) were measured using the Molecular Devices plate readers Spectra Max Gemini and Spectra Max 190 respectively.

**Table S1:** Important DNA sequences

| Name                                                       | Sequence                                                                                                                                                                                                                                                                                                                                                                                                                                                                                                                                                                                                                                                                                                                                                                                                                                                                                                                                                                                                                                                                                                                                                                           |
|------------------------------------------------------------|------------------------------------------------------------------------------------------------------------------------------------------------------------------------------------------------------------------------------------------------------------------------------------------------------------------------------------------------------------------------------------------------------------------------------------------------------------------------------------------------------------------------------------------------------------------------------------------------------------------------------------------------------------------------------------------------------------------------------------------------------------------------------------------------------------------------------------------------------------------------------------------------------------------------------------------------------------------------------------------------------------------------------------------------------------------------------------------------------------------------------------------------------------------------------------|
| Super folder green fluorescent protein (SFGFP)             | ATGAGCAAAGGAGAAGAAGAACTTTTCACTGGAGTTGTCCCAATTCTTGTTGAATT<br>AGATGGTGTATGTTAATGGGCACAAATTTTCTGTCCGTGGAGAGGGTGAAGGT<br>GATGCTACAAACGGAAAACCTCACCTTAAATTTATTTGCACTACTGGAAAAC<br>CCTGTTCCGTGGCCAACACTTGTCACTACTGACCTATGGTGTTCATGCTT<br>TTCCCGTTATCCGGATCACATGAAACGGCATGACTTTTTCAAGAGTGCCATGC<br>CCGAAGGTTATGTACAGGAACGCACTATATCTTTCAAAGATGACGGGACCTAC<br>AAGACGCGTGCTGAAGTCAAGTTTGAAGGTGATACCCTTGTTAATCGTATCGA<br>GTTAAAGGGTATTGATTTTAAAGAAGATGGAAACATTCTTGGACACAAACTCG<br>AGTACAACCTTAACTCACACAATGTATACATCACGGCAGACAAACAAAAGAAT<br>GGAATCAAAGCTAACTTCAAATTCGCCACAACGTTGAAGATGGTTCCGTTCA<br>ACTAGCAGACCATTATCAACAAAATACTCCAATTGGCGATGGCCCTGTCCCTT<br>TACCAGACAACCATTACCTGTCGACACAATCTGTCCCTTCGAAAGATCCCAAC<br>GAAAAGCGTGACCACATGGTCCTTCTTGAGTTTGTAACTGCTGCTGGGATTAC<br>ACATGGCATGGATGAGCTCTACAAA                                                                                                                                                                                                                                                                                                                                                                                       |
| Ribosome binding site (RBS)                                | AGGAGGAAGGATCT                                                                                                                                                                                                                                                                                                                                                                                                                                                                                                                                                                                                                                                                                                                                                                                                                                                                                                                                                                                                                                                                                                                                                                     |
| TrrnB                                                      | GAAGCTTGGGCCCGAACAAAACTCATCTCAGAAGAGGATCTGAATAGCGCC<br>GTCGACCATCATCATCATCATTGAGTTTAAACGGTCTCCAGCTTGGCTGT<br>TTTGGCGGATGAGAGAAGATTTTTCAGCCTGATACAGATTAATCAGAACGCAG<br>AAGCGGTCTGATAAAACAGAATTTGCCTGGCGGCAGTAGCGCGGTGGTCCCA<br>CCTGACCCCATGCCGAACCTCAGAAGTGAACGCCGTAGCGCCGATGGTAGTG<br>TGGGGTCTCCCATGCGAGAGTAGGGAAGTCCAGGCATCAAATAAACGAA<br>AGGCTCAGTCGAAAGACTGGGCCTTTCGTTTTATCTGTTGTTTGTGCGGTGAAC<br>T                                                                                                                                                                                                                                                                                                                                                                                                                                                                                                                                                                                                                                                                                                                                                                             |
| pT181 attenuator (EcoRI-J2319-attenuator-SFGFP-TrrnB-PstI) | GAATTC TAAAGATCT TTGACAGCTAGCTCAGTCCTAGGTATAATACTAGT AACAA<br>AAATAAAAAGGAGTCGCTCACGCCCTGACCAAAGTTTGTGAACGACATCATT<br>AAAGAAAAAAACACTGAGTTGTTTTATAATCTTGTATATTTAGATATTAACGA<br>TATTTAAATATACATAAAGATATATATTTGGGTGAGCGATTCTTAAACGAAATT<br>GAGATTAAGGAGTCGCTCTTTTTATGTATAAAAACAATCATGCAAATCATTCA<br>AATCATTTGGAAAATCACGATTTAGACAATTTTCTAAAACCGGCTACTCTAAT<br>AGCCGGTTGTAAGGATCTAGGAGGAAGGATCT ATGAGCAAAGGAGAAGAAGT<br>TTTCACTGGAGTTGTCCCAATTCTTGTTGAATTAGATGGTGTATGTTAATGGGCA<br>CAAATTTTCTGTCCGTGGAGAGGGTGAAGGTGATGCTACAAACGGAAAACCTC<br>ACCCTTAAATTTATTTGCACTACTGGAAAACCTGTTCCGTGGCCAACACTT<br>GTCACTACTCTGACCTATGGTGTTCATGCTTTTTCCCGTTATCCGGATCACAT<br>GAAACGGCATGACTTTTTCAAGAGTGCCATGCCCGAAGGTTATGTACAGGAA<br>CGCACTATATCTTCAAAGATGACGGGACCTACAAGACGCGTGCTGAAGTCAA<br>GTTTGAAGGTGATACCCTTGTTAATCGTATCGAGTTAAAGGGTATTGATTTTAA<br>AGAAGATGGAAACATTCTTGGACACAAACTCGAGTACAACCTTAACTCACACA<br>ATGTATACATCACGGCAGACAAACAAAAGAATGGAATCAAAGCTAACTTCAAA<br>ATTGCCACAACGTTGAAGATGGTTCCGTTCACTAGCAGACCATTATCAACA<br>AAATACTCCAATTGGCGATGGCCCTGTCCCTTTACCAGACAACCATTACCTGT<br>CGACACAATCTGTCCCTTCGAAAGATCCCAACGAAAAGCGTGACCACATGGTC<br>CTTCTTGAGTTTGTAACTGCTGCTGGGATTACACATGGCATGGATGAGCTCTA |



|         |                                                                                                                                                                                                                                                                                                                                |           |                           |
|---------|--------------------------------------------------------------------------------------------------------------------------------------------------------------------------------------------------------------------------------------------------------------------------------------------------------------------------------|-----------|---------------------------|
|         | TTTATAATCTTGTATATTTAGATATTAACGATATTTAAATA<br>TACATAAAGATATATATTTGGGTGAGCGATTCTTAAACG<br>AAATTGAGATTAAGGAGTCGCTCTTTTTATGTATAAAAAC<br>AATCATGCAAATCATTCAAATCATTTGGAAAATCACGATTT<br>AGACAATTTTCTAAAACCGGCTACTCTAATAGCCGGTTG<br>TAA                                                                                                |           |                           |
| JBL009  | AACAAAATAAAAAGGAGTCGCTCGTACCCTCTGCAAAGTT<br>AACGAACGACATCATTCAAAGAAAAAAACACTGAGTTGTT<br>TTTATAATCTTGTATATTTAGATATTAACGATATTTAAATA<br>TACATAAAGATATATATTTGGGTGAGCGATTCTTAAACG<br>AAATTGAGATTAAGGAGTCGCTCTTTTTATGTATAAAAAC<br>AATCATGCAAATCATTCAAATCATTTGGAAAATCACGATTT<br>AGACAATTTTCTAAAACCGGCTACTCTAATAGCCGGTTG<br>TAA        | pT181.YS  | 6, S7,<br>S8              |
| JBL1037 | AACAAAATAAAAAGGAGTCGCTCACGCTTTGGCGAGTGT<br>GAACGACATCATTCAAAGAAAAAAACACTGAGTTGTTTT<br>ATAATCTTGTATATTTAGATATTAACGATATTTAAATATAC<br>ATAAAGATATATTTGGGTGAGCGATTCTTAAACGAAA<br>TTGAGATTAAGGAGTCGCTCTTTTTATGTATAAAAACAAT<br>CATGCAAATCATTCAAATCATTTGGAAAATCACGATTTAGA<br>CAATTTTTCTAAAACCGGCTACTCTAATAGCCGGTTGTAA                  | Fusion 10 | S2                        |
| JBL1126 | AACAAAATAAAAAGGAGTCGCTCACGTTCAACTTTGGCGA<br>GTACGA TGTGAACGACATCATTCAAAGAAAAAAACACTGA<br>GTTGTTTTTATAATCTTGTATATTTAGATATTAACGATATT<br>TAAATATACATAAAGATATATATTTGGGTGAGCGATTCTT<br>AAACGAAATTGAGATTAAGGAGTCGCTCTTTTTATGTATA<br>AAAACAATCATGCAAATCATTCAAATCATTTGGAAAATCAC<br>GATTTAGACAATTTTCTAAAACCGGCTACTCTAATAGCC<br>GGTTGTAA | Fusion 4  | 3, 5, 6,<br>S5, S7,<br>S8 |
| JBL1016 | AACAAAATAAAAAGGAGTCGCTCACTTTGGCGAGTGAAC<br>GACATCATTCAAAGAAAAAAACACTGAGTTGTTTTTATAAT<br>CTTGTATATTTAGATATTAACGATATTTAAATATACATAAA<br>GATATATATTTGGGTGAGCGATTCTTAAACGAAATTGAG<br>ATTAAGGAGTCGCTCTTTTTATGTATAAAAACAATCATGC<br>AAATCATTCAAATCATTTGGAAAATCACGATTTAGACAATT<br>TTTCTAAAACCGGCTACTCTAATAGCCGGTTGTAA                   | Fusion 11 | S2                        |
| JBL1048 | AACAAAATAAAAAGGAGTCGCTCATTCAACTTTGGCGAGT<br>ACGATGAACGACATCATTCAAAGAAAAAAACACTGAGTTG<br>TTTTTATAATCTTGTATATTTAGATATTAACGATATTTAA<br>TACATAAAGATATATATTTGGGTGAGCGATTCTTAAAC<br>GAAATTGAGATTAAGGAGTCGCTCTTTTTATGTATAAAA<br>CAATCATGCAAATCATTCAAATCATTTGGAAAATCACGATT<br>TAGACAATTTTCTAAAACCGGCTACTCTAATAGCCGGTT<br>GTAA          | Fusion 12 | S2                        |
| JBL1815 | AACAAAATAAAAAGGAGTCGCTCACGCTTGGCGGTGTGA<br>ACGACATCATTCAAAGAAAAAAACACTGAGTTGTTTTATA<br>ATCTTGTATATTTAGATATTAACGATATTTAAATATACATA<br>AAGATATATATTTGGGTGAGCGATTCTTAAACGAAATTG<br>AGATTAAGGAGTCGCTCTTTTTATGTATAAAAACAATCAT<br>GCAAATCATTCAAATCATTTGGAAAATCACGATTTAGACAA<br>TTTTTCTAAAACCGGCTACTCTAATAGCCGGTTGTAA                  | Fusion 1  | 2                         |
| JBL1017 | AACAAAATAAAAAGGAGTCGCTCACGGAACCTTGGCGGAA<br>CTGTGAACGACATCATTCAAAGAAAAAAACACTGAGTTGT<br>TTTTTATAATCTTGTATATTTAGATATTAACGATATTTAAAT<br>ATACATAAAGATATATATTTGGGTGAGCGATTCTTAAAC                                                                                                                                                  | Fusion 2  | 2                         |

|         |                                                                                                                                                                                                                                                                                                                                 |           |                    |
|---------|---------------------------------------------------------------------------------------------------------------------------------------------------------------------------------------------------------------------------------------------------------------------------------------------------------------------------------|-----------|--------------------|
|         | GAAATTGAGATTAAGGAGTCGCTCTTTTTTATGTATAAAAA<br>CAATCATGCAAATCATTCAAATCATTTGGAAAATCACGATT<br>TAGACAATTTTTCTAAAACCGGCTACTCTAATAGCCGGTT<br>GTAA                                                                                                                                                                                      |           |                    |
| JBL1039 | AACAAAATAAAAAGGAGTCGCTCACGCCTCGAACTTGGC<br>GGAACGCAGTGTGAACGACATCATTCAAAGAAAAAACA<br>CTGAGTTGTTTTATAATCTTGTATATTTAGATATTAACG<br>ATATTTAAATATACATAAAGATATATTTGGGTGAGCGAT<br>TCCTTAAACGAAATTGAGATTAAGGAGTCGCTCTTTTTAT<br>GTATAAAAAAATCATGCAAATCATTCAAATCATTTGGAAA<br>ATCACGATTTAGACAATTTTTCTAAAACCGGCTACTCTAAT<br>AGCCGGTTGTAA    | Fusion 3  | 2, 5, 6,<br>S5, S7 |
| JBL1813 | AACAAAATAAAAAGGAGTCGCTCACTTGGCGGTGAACGA<br>CATCATTCAAAGAAAAAACAACACTGAGTTGTTTTATAATCT<br>TGTATATTTAGATATTAACGATATTTAAATATACATAAAGA<br>TATATATTTGGGTGAGCGATTCTTAAACGAAATTGAGAT<br>TAAGGAGTCGCTCTTTTTATGTATAAAAAACAATCATGCAA<br>ATCATTCAAATCATTGGAAAATCACGATTTAGACAATTTT<br>TCTAAAACCGGCTACTCTAATAGCCGGTTGTAA                     | Fusion 7  | S2                 |
| JBL1018 | AACAAAATAAAAAGGAGTCGCTCAGAACTTGGCGGAAC<br>GAACGACATCATTCAAAGAAAAAACAACACTGAGTTGTTTT<br>ATAATCTTGTATATTTAGATATTAACGATATTTAAATATAC<br>ATAAAGATATATATTTGGGTGAGCGATTCTTAAACGAAA<br>TTGAGATTAAGGAGTCGCTCTTTTTATGTATAAAAAACAAT<br>CATGCAAATCATTCAAATCATTTGGAAAATCACGATTTAGA<br>CAATTTTTCTAAAACCGGCTACTCTAATAGCCGGTTGTAA               | Fusion 8  | S2                 |
| JBL1019 | AACAAAATAAAAAGGAGTCGCTCACCTCGAACTTGGCGG<br>AACGCAGTGAACGACATCATTCAAAGAAAAAACAACACTGAG<br>TTGTTTTATAATCTTGTATATTTAGATATTAACGATATTT<br>AAATATACATAAAGATATATATTTGGGTGAGCGATTCTTA<br>AACGAAATTGAGATTAAGGAGTCGCTCTTTTTATGTATAA<br>AAACAATCATGCAAATCATTCAAATCATTGGAAAATCACG<br>ATTTAGACAATTTTTCTAAAACCGGCTACTCTAATAGCCG<br>GTTGTAA    | Fusion 9  | S2                 |
| JBL1040 | AACAAAATAAAAAGGAGTCGCTCACGCTTACGAACTTGGC<br>GGAACGACGTGTGAACGACATCATTCAAAGAAAAAACA<br>CTGAGTTGTTTTATAATCTTGTATATTTAGATATTAACG<br>ATATTTAAATATACATAAAGATATATATTTGGGTGAGCGAT<br>TCCTTAAACGAAATTGAGATTAAGGAGTCGCTCTTTTTAT<br>GTATAAAAAAATCATGCAAATCATTCAAATCATTTGGAAA<br>ATCACGATTTAGACAATTTTTCTAAAACCGGCTACTCTAAT<br>AGCCGGTTGTAA | Fusion 5  | 3                  |
| JBL1020 | AACAAAATAAAAAGGAGTCGCTCACTTACGAACTTGGCG<br>GAACGACGTGAACGACATCATTCAAAGAAAAAACAACACTGA<br>GTTGTTTTATAATCTTGTATATTTAGATATTAACGATATT<br>TAAATATACATAAAGATATATATTTGGGTGAGCGATTCTT<br>AAACGAAATTGAGATTAAGGAGTCGCTCTTTTTATGTATA<br>AAAACAATCATGCAAATCATTCAAATCATTTGGAAAATCAC<br>GATTTAGACAATTTTTCTAAAACCGGCTACTCTAATAGCC<br>GGTTGTAA  | Fusion 6  | 3, 6,<br>S7, S8    |
| JBL1057 | AACAAAATAAAAAGGAGTCGCTCACGGATTTTTTCGCGAAA<br>CCTGTGAACGACATCATTCAAAGAAAAAACAACACTGAGTTG<br>TTTTATAATCTTGTATATTTAGATATTAACGATATTTAA<br>TATACATAAAGATATATATTTGGGTGAGCGATTCTTAAAC<br>GAAATTGAGATTAAGGAGTCGCTCTTTTTATGTATAAAAA                                                                                                      | Fusion 17 | S3                 |

|         |                                                                                                                                                                                                                                                                                                                                                 |                |                           |
|---------|-------------------------------------------------------------------------------------------------------------------------------------------------------------------------------------------------------------------------------------------------------------------------------------------------------------------------------------------------|----------------|---------------------------|
|         | CAATCATGCAAATCATTCAAATCATTTGGAAAATCACGATT<br>TAGACAATTTTTCTAAAACCGGCTACTCTAATAGCCGGTT<br>GTAA                                                                                                                                                                                                                                                   |                |                           |
| JBL1059 | AACAAAATAAAAAGGAGTCGCTCACGTTGATTTTTTCGCGA<br>AACCATTTGTGAACGACATCATTCAAAGAAAAAAACACTG<br>AGTTGTTTTTATAATCTTGTATATTTAGATATTAACGATAT<br>TTAAATATACATAAAGATATATATTTGGGTGAGCGATTCTT<br>TAAACGAAATTGAGATTAAGGAGTCGCTCTTTTTTATGTAT<br>AAAAACAATCATGCAAATCATTCAAATCATTTGGAAAATCA<br>CGATTTAGACAATTTTTCTAAAACCGGCTACTCTAATAGC<br>CGGTTGTAA              | Fusion 18      | S3                        |
| JBL1805 | AACAAAATAAAAAGGAGTCGCTCACGTCTGATTATTGATT<br>TTTCGCGAAACCATTTAATCATATGTGAACGACATCATTCA<br>AAGAAAAAAACACTGAGTTGTTTTTATAATCTTGTATATTT<br>AGATATTAACGATATTTAAATATACATAAAGATATATATTT<br>GGGTGAGCGATTCTTAAACGAAATTGAGATTAAGGAGT<br>CGCTCTTTTTATGTATAAAAACAATCATGCAAATCATTCA<br>AATCATTTGGAAAATCACGATTTAGACAATTTTTCTAAAAC<br>CGGCTACTCTAATAGCCGGTTGTAA | Fusion 19      | S3                        |
| JBL1063 | AACAAAATAAAAAGGAGTCGCTCA GATTTTTTCGCGAAACC<br>TGAACGACATCATTCAAAGAAAAAAACACTGAGTTGTTTTT<br>ATAATCTTGTATATTTAGATATTAACGATATTTAAATATAC<br>ATAAAGATATATATTTGGGTGAGCGATTCTTAAACGAAA<br>TTGAGATTAAGGAGTCGCTCTTTTTTATGTATAAAAACAAT<br>CATGCAAATCATTCAAATCATTTGGAAAATCACGATTTAGA<br>CAATTTTTCTAAAACCGGCTACTCTAATAGCCGGTTGTAA                           | Fusion 13      | 4                         |
| JBL1065 | AACAAAATAAAAAGGAGTCGCTCATTGATTTTTTCGCGAAA<br>CCATTTGAACGACATCATTCAAAGAAAAAAACACTGAGTT<br>GTTTTTATAATCTTGTATATTTAGATATTAACGATATTTAA<br>ATATACATAAAGATATATATTTGGGTGAGCGATTCTTAAA<br>CGAAATTGAGATTAAGGAGTCGCTCTTTTTTATGTATAAAA<br>ACAATCATGCAAATCATTCAAATCATTTGGAAAATCACGAT<br>TTAGACAATTTTTCTAAAACCGGCTACTCTAATAGCCGGT<br>TGTA                    | Fusion 14      | 4                         |
| JBL1166 | AACAAAATAAAAAGGAGTCGCTCATCTGATTATTGATTTTT<br>CGCGAAACCATTTAATCATATGAACGACATCATTCAAAGA<br>AAAAAAACACTGAGTTGTTTTTATAATCTTGTATATTTAGAT<br>ATTAACGATATTTAAATATACATAAAGATATATATTTGGG<br>TGAGCGATTCTTAAACGAAATTGAGATTAAGGAGTCGCT<br>CTTTTTTATGTATAAAAACAATCATGCAAATCATTCAAATC<br>ATTTGGAAAATCACGATTTAGACAATTTTTCTAAAACCGGC<br>TACTCTAATAGCCGGTTGTAA   | Fusion 15      | 4, 5, 6,<br>S6, S7,<br>S8 |
| JBL1110 | AACAAAATAAAAAGGAGTCGCTCACCTATGTCTAGTCCAC<br>ATCAGTGAACGACATCATTCAAAGAAAAAAACACTGAGTT<br>GTTTTTATAATCTTGTATATTTAGATATTAACGATATTTAA<br>ATATACATAAAGATATATATTTGGGTGAGCGATTCTTAAA<br>CGAAATTGAGATTAAGGAGTCGCTCTTTTTTATGTATAAAA<br>ACAATCATGCAAATCATTCAAATCATTTGGAAAATCACGAT<br>TTAGACAATTTTTCTAAAACCGGCTACTCTAATAGCCGGT<br>TGTA                     | Fusion 16      | 4, 5, 6,<br>S5, S7,<br>S8 |
| JBL1190 | AACAAAATAAAAAGGAGTCGCTCATCTGATTATTGATTTtG<br>gcGAAACCATTTAATCATATGAACGACATCATTCAAAGAAA<br>AAAACACTGAGTTGTTTTTATAATCTTGTATATTTAGATATT<br>AAACGATATTTAAATATACATAAAGATATATATTTGGGTGA<br>GCGATTCTTAAACGAAATTGAGATTAAGGAGTCGCTCTT                                                                                                                    | Fusion<br>15m1 | S6                        |

|         |                                                                                                                                                                                                                                                                                                                                             |                |                        |
|---------|---------------------------------------------------------------------------------------------------------------------------------------------------------------------------------------------------------------------------------------------------------------------------------------------------------------------------------------------|----------------|------------------------|
|         | TTTTATGTATAAAAACAATCATGCAAATCATTCAAATCATT<br>GGAAAATCACGATTTAGACAATTTTTCTAAAACCGGCTAC<br>TCTAATAGCCGGTTGTAA                                                                                                                                                                                                                                 |                |                        |
| JBL1191 | AACAAAATAAAAAGGAGTCGCTCATCTGATTATTGATTTA<br>cgcGAAACCATTTAATCATATGAACGACATCATTCAAAGAA<br>AAAAACACTGAGTTGTTTTATAATCTTGTATATTTAGATAT<br>TAAACGATATTTAAATATACATAAAGATATATATTTGGGTG<br>AGCGATTCTTAAACGAAATTGAGATTAAGGAGTCGCTCT<br>TTTTTATGTATAAAAACAATCATGCAAATCATTCAAATCATT<br>TGAAAATCACGATTTAGACAATTTTTCTAAAACCGGCTA<br>CTCTAATAGCCGGTTGTAA  | Fusion<br>15m2 | S6                     |
| JBL1192 | AACAAAATAAAAAGGAGTCGCTCATCTGATTATTGATTTAA<br>GCcGAAACCATTTAATCATATGAACGACATCATTCAAAGAA<br>AAAAACACTGAGTTGTTTTATAATCTTGTATATTTAGATAT<br>TAAACGATATTTAAATATACATAAAGATATATATTTGGGTG<br>AGCGATTCTTAAACGAAATTGAGATTAAGGAGTCGCTCT<br>TTTTTATGTATAAAAACAATCATGCAAATCATTCAAATCATT<br>TGAAAATCACGATTTAGACAATTTTTCTAAAACCGGCTA<br>CTCTAATAGCCGGTTGTAA | Fusion<br>15m3 | S6                     |
| JBL1199 | AACAAAATAAAAAGGAGTCGCTCATCTGATTATTGATTTA<br>cCcGAAACCATTTAATCATATGAACGACATCATTCAAAGAA<br>AAAAACACTGAGTTGTTTTATAATCTTGTATATTTAGATAT<br>TAAACGATATTTAAATATACATAAAGATATATATTTGGGTG<br>AGCGATTCTTAAACGAAATTGAGATTAAGGAGTCGCTCT<br>TTTTTATGTATAAAAACAATCATGCAAATCATTCAAATCATT<br>TGAAAATCACGATTTAGACAATTTTTCTAAAACCGGCTA<br>CTCTAATAGCCGGTTGTAA  | Fusion<br>15m4 | S6                     |
| JBL1193 | AACAAAATAAAAAGGAGTCGCTCATCTGATTATTGATTTcg<br>gggGAAACCATTTAATCATATGAACGACATCATTCAAAGAA<br>AAAAACACTGAGTTGTTTTATAATCTTGTATATTTAGATAT<br>TAAACGATATTTAAATATACATAAAGATATATATTTGGGTG<br>AGCGATTCTTAAACGAAATTGAGATTAAGGAGTCGCTCT<br>TTTTTATGTATAAAAACAATCATGCAAATCATTCAAATCATT<br>TGAAAATCACGATTTAGACAATTTTTCTAAAACCGGCTA<br>CTCTAATAGCCGGTTGTAA | Fusion<br>15m5 | 5, 6,<br>S6, S7,<br>S8 |
| JBL1080 | AACAAAATAAAAAGGAGTCGCTCACGTTCAAtgaTTGGCGtca<br>ACGATGTGAACGACATCATTCAAAGAAAAAAACACTGAGT<br>TGTTTTTATAATCTTGTATATTTAGATATTAACGATATTTA<br>AATATACATAAAGATATATATTTGGGTGAGCGATTCTTAA<br>ACGAAATTGAGATTAAGGAGTCGCTCTTTTTTATGTATAAA<br>ACAATCATGCAAATCATTCAAATCATTGGAAAATCACGA<br>TTTAGACAATTTTTCTAAAACCGGCTACTCTAATAGCCGG<br>TTGTAA              | Fusion 4m1     | 5, 6,<br>S7, S8        |
| JBL1111 | AACAAAATAAAAAGGAGTCGCTCACGtgtTTCAACTTTGGC<br>GAGTACGAgcaTGTGAACGACATCATTCAAAGAAAAAAAC<br>ACTGAGTTGTTTTATAATCTTGTATATTTAGATATTAAC<br>GATATTTAAATATACATAAAGATATATATTTGGGTGAGCGA<br>TTCCTTAAACGAAATTGAGATTAAGGAGTCGCTCTTTTTTA<br>TGATAAAAACAATCATGCAAATCATTCAAATCATTGGAA<br>AATCACGATTTAGACAATTTTTCTAAAACCGGCTACTCTAA<br>TAGCCGGTTGTAA         | Fusion 4m2     | 5, 6,<br>S7            |
| JBL1075 | AACAAAATAAAAAGGAGTCGCTCACGTTCAACTTTcaCGA<br>GTACGA TGTGAACGACATCATTCAAAGAAAAAAACACTGA<br>GTTGTTTTTATAATCTTGTATATTTAGATATTAACGATATT<br>TAAATATACATAAAGATATATATTTGGGTGAGCGATTCTT                                                                                                                                                              | Fusion 4m3     | S5                     |

|         |                                                                                                                                                                                                                                                                                                                                  |             |                 |
|---------|----------------------------------------------------------------------------------------------------------------------------------------------------------------------------------------------------------------------------------------------------------------------------------------------------------------------------------|-------------|-----------------|
|         | AAACGAAATTGAGATTAAGGAGTCGCTCTTTTTTATGTATA<br>AAAACAATCATGCAAATCATTCAAATCATTTGGAAAATCAC<br>GATTTAGACAATTTTTCTAAAACCGGCTACTCTAATAGCC<br>GGTTGTAA                                                                                                                                                                                   |             |                 |
| JBL1113 | AACAAAATAAAAAGGAGTCGCTCACGagCAACTTTGGCGA<br>GTACTtTGGAACGACATCATTCAAAGAAAAAAACACTGAG<br>TTGTTTTATAATCTTGATATTTAGATATTAACGATATTT<br>AAATATACATAAAGATATATATTTGGGTGAGCGATTCTTA<br>AACGAAATTGAGATTAAGGAGTCGCTCTTTTTTATGTATAA<br>AAACAATCATGCAAATCATTCAAATCATTTGGAAAATCACG<br>ATTTAGACAATTTTTCTAAAACCGGCTACTCTAATAGCCG<br>GTTGTAA     | Fusion 4m4  | S5              |
| JBL1163 | AACAAAATAAAAAGGAGTCGCTCACGCCTCGAAgTTGGC<br>GcAACGCAGTGTGAACGACATCATTCAAAGAAAAAAACAC<br>TGAGTTGTTTTATAATCTTGATATTTAGATATTAACGAT<br>ATTTAAATATACATAAAGATATATATTTGGGTGAGCGATT<br>CTTAAACGAAATTGAGATTAAGGAGTCGCTCTTTTTTATGT<br>ATAAAAACAATCATGCAAATCATTCAAATCATTTGGAAAAT<br>CACGATTTAGACAATTTTTCTAAAACCGGCTACTCTAATAG<br>CCGGTTGTAA  | Fusion 3m1  | 5, 6,<br>S7, S8 |
| JBL1165 | AACAAAATAAAAAGGAGTCGCTCACGCacCGAACTTGCGC<br>GAACGtcGTGTGAACGACATCATTCAAAGAAAAAAACACT<br>GAGTTGTTTTATAATCTTGATATTTAGATATTAACGATA<br>TTTAAATATACATAAAGATATATATTTGGGTGAGCGATTCC<br>TTAAACGAAATTGAGATTAAGGAGTCGCTCTTTTTTATGTA<br>TAAAAACAATCATGCAAATCATTCAAATCATTTGGAAAATC<br>ACGATTTAGACAATTTTTCTAAAACCGGCTACTCTAATAGC<br>CGGTTGTAA | Fusion 3m2  | 5, 6,<br>S7, S8 |
| JBL1164 | AACAAAATAAAAAGGAGTCGCTCACGCCTgcAACTTGCGC<br>GAAgcCAGTGTGAACGACATCATTCAAAGAAAAAAACACT<br>GAGTTGTTTTATAATCTTGATATTTAGATATTAACGATA<br>TTTAAATATACATAAAGATATATATTTGGGTGAGCGATTCC<br>TTAAACGAAATTGAGATTAAGGAGTCGCTCTTTTTTATGTA<br>TAAAAACAATCATGCAAATCATTCAAATCATTTGGAAAATC<br>ACGATTTAGACAATTTTTCTAAAACCGGCTACTCTAATAGC<br>CGGTTGTAA | Fusion 3m3  | S5              |
| JBL1150 | AACAAAATAAAAAGGAGTCGCTCACCTATGTCTgaTCCAC<br>ATCAGTGAACGACATCATTCAAAGAAAAAAACACTGAGTT<br>GTTTTATAATCTTGATATTTAGATATTAACGATATTTAA<br>ATATACATAAAGATATATATTTGGGTGAGCGATTCTTAAA<br>CGAAATTGAGATTAAGGAGTCGCTCTTTTTTATGTATAAAA<br>ACAATCATGCAAATCATTCAAATCATTTGGAAAATCACGAT<br>TTAGACAATTTTTCTAAAACCGGCTACTCTAATAGCCGGT<br>TGTA        | Fusion 16m1 | 5, 6,<br>S7     |
| JBL1146 | AACAAAATAAAAAGGAGTCGCTCACCTATGTCTtGTCCAC<br>ATCAGTGAACGACATCATTCAAAGAAAAAAACACTGAGTT<br>GTTTTATAATCTTGATATTTAGATATTAACGATATTTAA<br>ATATACATAAAGATATATATTTGGGTGAGCGATTCTTAAA<br>CGAAATTGAGATTAAGGAGTCGCTCTTTTTTATGTATAAAA<br>ACAATCATGCAAATCATTCAAATCATTTGGAAAATCACGAT<br>TTAGACAATTTTTCTAAAACCGGCTACTCTAATAGCCGGT<br>TGTA        | Fusion 16m2 | S5              |
| JBL1145 | AACAAAATAAAAAGGAGTCGCTCACCTATGTCTAaTCCAC<br>ATCAGTGAACGACATCATTCAAAGAAAAAAACACTGAGTT<br>GTTTTATAATCTTGATATTTAGATATTAACGATATTTAA                                                                                                                                                                                                  | Fusion 16m3 | S5              |



|  |                                                                                                                                                                         |  |  |
|--|-------------------------------------------------------------------------------------------------------------------------------------------------------------------------|--|--|
|  | ATATACATAAAGATATATATTTGGGTGAGCGATTCCTTAAACGAAATTGAGATTAAGGAGTCGCTCTTTTTTATGTATAAAAACAATCATGCAAATCATTCAAATCATTGGAAAAATCACGATTTAGACAATTTTTCTAAAACCGGCTACTCTAATAGCCGGTGTAA |  |  |
|--|-------------------------------------------------------------------------------------------------------------------------------------------------------------------------|--|--|

**Table S3:** Antisense plasmids used in this study. Plasmid sequences can be constructed by replacing the blue region in the pT181 antisense sequence in Table S1 with the blue region indicated here. White background indicates fusion sequence. Lower case nucleotides indicate mutations made to fusions. All chimeric fusions constructed, with the exception of several non-functional mutants, are reported in this table and in Table S3.

| Plasmid # | Antisense sequence                                                                                        | Name                 | Figure                                             |
|-----------|-----------------------------------------------------------------------------------------------------------|----------------------|----------------------------------------------------|
| JBL002    | J23119 – TrnB – AmpR – ColE1 origin                                                                       | No antisense control |                                                    |
| JBL004    | ATACAAGATTATAAAAACAACTCAGTGTTTTTTCTTTGAA<br>TGATGTCGTTCACTCGCCAAAGCGTGAGCGACT<br>CCTTTTTATTT – TrnB       | pT181                | 2, 3, 4,<br>5, 6,<br>S2, S3,<br>S5, S6,<br>S7, S8, |
| JBL008    | ATACAAGATTATAAAAACAACTCAGTGTTTTTTCTTTGAA<br>TGATGTCGTTCTGCAACTTTGGCGAGGGACAGAGCGACT<br>CCTTTTTATTT – TrnB | pT181.H1             | 6, S7,<br>S8                                       |
| JBL010    | ATACAAGATTATAAAAACAACTCAGTGTTTTTTCTTTGAA<br>TGATGTCGTTCTGCAACTTTGGCGAGGGACAGAGCGACT<br>CCTTTTTATTT – TrnB | pT181.YS             | 6, S7,<br>S8                                       |
| JBL1049   | ATACAAGATTATAAAAACAACTCAGTGTTTTTTCTTTGAA<br>TGATGTCGTTCACTCGCCAAAGCGTGAGCGACTCCTT<br>TTTATT – TrnB        | Fusion 10            | S2                                                 |
| JBL1033   | ATACAAGATTATAAAAACAACTCAGTGTTTTTTCTTTGAA<br>TGATGTCGTTCACTCGCCAAAGTTGAACTGAGCGACTCCTTTTTATTT – TrnB       | Fusion 4             | 3, 5, 6,<br>S5, S7,<br>S8                          |
| JBL1026   | ATACAAGATTATAAAAACAACTCAGTGTTTTTTCTTTGAA<br>TGATGTCGTTCACTCGCCAAAGTGAGCGACTCCTTTTTATTT – TrnB             | Fusion 11            | S2                                                 |
| JBL1034   | ATACAAGATTATAAAAACAACTCAGTGTTTTTTCTTTGAA<br>TGATGTCGTTCACTCGCCAAAGTTGAACTGAGCGACTCCTTTTTATTT – TrnB       | Fusion 12            | S2                                                 |
| JBL1812   | ATACAAGATTATAAAAACAACTCAGTGTTTTTTCTTTGAA<br>TGATGTCGTTCACTCGCCAAAGCGTGAGCGACTCCTTTTTATTT – TrnB           | Fusion 1             | 2                                                  |
| JBL1027   | ATACAAGATTATAAAAACAACTCAGTGTTTTTTCTTTGAA<br>TGATGTCGTTCACTCGCCAAAGTTGAACTGAGCGACTCCTTTTTATTT – TrnB       | Fusion 2             | 2                                                  |
| JBL1035   | ATACAAGATTATAAAAACAACTCAGTGTTTTTTCTTTGAA<br>TGATGTCGTTCACTCGCCAAAGTTGAACTGAGCGACTCCTTTTTATTT – TrnB       | Fusion 3             | 2, 5, 6,<br>S5, S7                                 |
| JBL1814   | ATACAAGATTATAAAAACAACTCAGTGTTTTTTCTTTGAA<br>TGATGTCGTTCACTCGCCAAAGTGAGCGACTCCTTTTTATTT – TrnB             | Fusion 7             | S2                                                 |
| JBL1028   | ATACAAGATTATAAAAACAACTCAGTGTTTTTTCTTTGAA<br>TGATGTCGTTCACTCGCCAAAGTTGAACTGAGCGACTCCTTTTTATTT – TrnB       | Fusion 8             | S2                                                 |

|         |                                                                                                                         |                |                           |
|---------|-------------------------------------------------------------------------------------------------------------------------|----------------|---------------------------|
| JBL1024 | ATACAAGATTATAAAAAACAACTCAGTGTTTTTTCTTTGAA<br>TGATGTCGTTCACTGCGTTCGCCAAGTTCGAGGTGAGC<br>GACTCCTTTTTATTI – TrrnB          | Fusion 9       | S2                        |
| JBL1036 | ATACAAGATTATAAAAAACAACTCAGTGTTTTTTCTTTGAA<br>TGATGTCGTTCACTGCGTTCGCCAAGTTCGTAAGCG<br>TGAGCGACTCCTTTTTATTI – TrrnB       | Fusion 5       | 3                         |
| JBL1029 | ATACAAGATTATAAAAAACAACTCAGTGTTTTTTCTTTGAA<br>TGATGTCGTTCACTGCGTTCGCCAAGTTCGTAAGTGAG<br>CGACTCCTTTTTATTI – TrrnB         | Fusion 6       | 3, 6,<br>S7, S8           |
| JBL1119 | GCGAAAATCCGTGAGCGACTCCTTTTTATTI – t500                                                                                  | Fusion 17      | S3                        |
| JBL1093 | GCGAAAATCAA CGTGAGCGACTCCTTTTTATTI – t500                                                                               | Fusion 18      | S3                        |
| JBL1806 | GCGAAAATCAATAATCAGACGTGAGCGACTCCTTTTTAT<br>TI – t500                                                                    | Fusion 19      | S3                        |
| JBL1064 | GCGAAAATCTGAGCGACTCCTTTTTATTI – TrrnB                                                                                   | Fusion 13      | 4                         |
| JBL1095 | GCGAAAATCTGAGCGACTCCTTTTTATTI – t500                                                                                    | Fusion 13      | 4                         |
| JBL1096 | GCGAAAATCAA TGAGCGACTCCTTTTTATTI – t500                                                                                 | Fusion 14      | 4                         |
| JBL1170 | GCGAAAATCAATAATCAGATGAGCGACTCCTTTTTATTI<br>– t500                                                                       | Fusion 15      | 4, 5, 6,<br>S6, S7,<br>S8 |
| JBL1133 | GACTAGACATAGG TGAGCGACTCCTTTTTATTI – t500                                                                               | Fusion 16      | 4, 5, 6,<br>S5, S7        |
| JBL1194 | gcCaaAAATCAATAATCAGATGAGCGACTCCTTTTTATTI –<br>t500                                                                      | Fusion<br>15m1 | S6                        |
| JBL1195 | gcgTaAAATCAATAATCAGATGAGCGACTCCTTTTTATTI –<br>t500                                                                      | Fusion<br>15m2 | S6                        |
| JBL1196 | gGCTTAAATCAATAATCAGATGAGCGACTCCTTTTTATTI –<br>t500                                                                      | Fusion<br>15m3 | S6                        |
| JBL1197 | gGgTaAAATCAATAATCAGATGAGCGACTCCTTTTTATTI –<br>t500                                                                      | Fusion<br>15m4 | S6                        |
| JBL1198 | ccccgAAATCAATAATCAGATGAGCGACTCCTTTTTATTI –<br>t500                                                                      | Fusion<br>15m5 | 5, 6,<br>S6, S7,<br>S8    |
| JBL1081 | ATACAAGATTATAAAAAACAACTCAGTGTTTTTTCTTTGAA<br>TGATGTCGTTCACTCGTtgaCGCCAAcaTGAA CGTGAGC<br>GACTCCTTTTTATTI – TrrnB        | Fusion 4m1     | 5, 6,<br>S7, S8           |
| JBL1074 | ATACAAGATTATAAAAAACAACTCAGTGTTTTTTCTTTGAA<br>TGATGTCGTTCACTgcTCGTA CTG CCAAAGTTGAAacaC<br>GTGAGCGACTCCTTTTTATTI – TrrnB | Fusion 4m2     | 5, 6,<br>S7               |
| JBL1076 | ATACAAGATTATAAAAAACAACTCAGTGTTTTTTCTTTGAA<br>TGATGTCGTTCACTCGTACTCGtgAAAGTTGAA CGTGAG<br>CGACTCCTTTTTATTI – TrrnB       | Fusion 4m3     | S5                        |
| JBL1120 | ATACAAGATTATAAAAAACAACTCAGTGTTTTTTCTTTGAA<br>TGATGTCGTTCACTaaGTACTCGtgAAAGTTGct CGTGAGC<br>GACTCCTTTTTATTI – TrrnB      | Fusion 4m4     | S5                        |
| JBL1169 | ATACAAGATTATAAAAAACAACTCAGTGTTTTTTCTTTGAA<br>TGATGTCGTTCACTCTGCGTTgCGCCAAcTTCGAGG CGTG<br>AGCGACTCCTTTTTATTI – TrrnB    | Fusion 3m1     | 5, 6,<br>S7, S8           |
| JBL1174 | ATACAAGATTATAAAAAACAACTCAGTGTTTTTTCTTTGAA<br>TGATGTCGTTCACTCgaCGTTCGCCAAGTTCGgtG CGTG<br>AGCGACTCCTTTTTATTI – TrrnB     | Fusion 3m2     | 5, 6,<br>S7, S8           |
| JBL1173 | ATACAAGATTATAAAAAACAACTCAGTGTTTTTTCTTTGAA<br>TGATGTCGTTCACTCTGgcTTCCGCCAAGTTgcAGG CGTG<br>AGCGACTCCTTTTTATTI – TrrnB    | Fusion 3m3     | S5                        |
| JBL1180 | GATcAGACATAGG TGAGCGACTCCTTTTTATTI – t500                                                                               | Fusion<br>16m1 | 5, 6,<br>S7               |

|         |                                                 |                |    |
|---------|-------------------------------------------------|----------------|----|
| JBL1177 | GACaAGACATAGG <b>TGAGCGACTCCTTTTTATT</b> – t500 | Fusion<br>16m2 | S5 |
| JBL1167 | CCTATGTCTAaTC <b>TGAGCGACTCCTTTTTATT</b> – t500 | Fusion<br>16m3 | S5 |

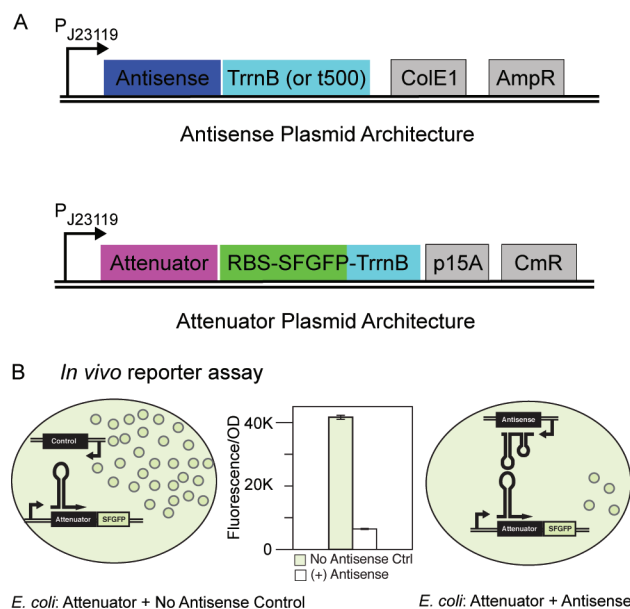

**Figure S1.** (A) Plasmid architecture for antisense and attenuator plasmids. All antisense plasmids have the ColE1 origin and ampicillin resistance (AmpR). All attenuator plasmids have the p15A origin and chloramphenicol resistance (CmR). The J23119 *E. Coli* consensus promoter ([http://partsregistry.org/Part:BBa\\_J23119](http://partsregistry.org/Part:BBa_J23119)), modified to include a *SpeI* site right before the start of transcription, was used for all plasmids. TrnB and t500 are transcriptional terminator sequences. RBS = ribosome binding site; SFGFP = super folder green fluorescent protein coding sequence. See Table S1 for sequence details of these plasmids. (B) Diagram of *in vivo* gene expression assay with example results. *E. coli* TG1 cells are transformed with a plasmid containing the attenuator transcriptionally fused to SFGFP, and another plasmid encoding antisense (white bar) or a no antisense control plasmid (green bar).

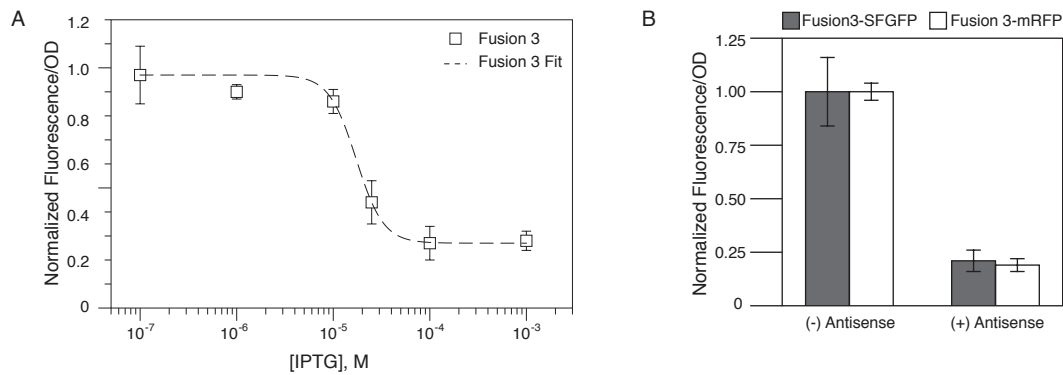

**Figure S2.** Fusion 3 inducibility and functional modularity. (A) Induction curve using an IPTG inducible  $P_{Lac0-1}$  promoter (40) for Fusion 3. Fluorescence/OD are plotted for different concentrations of IPTG in the growth media (see Materials and Methods above). Data were normalized to the no antisense condition. The dashed line shows a Hill equation fit to the data ( $n = 3.07$ ). Error bars represent standard deviations of at least 4 independent transformants. (B) Comparison of *in vivo* expression data using SFGFP (grey bars) and monomeric red fluorescent protein (mRFP) (white bars) as reporters for Fusion 3 attenuation. Data were normalized to the no antisense condition in each case. Error bars represent standard deviations of at least 5 independent transformants.

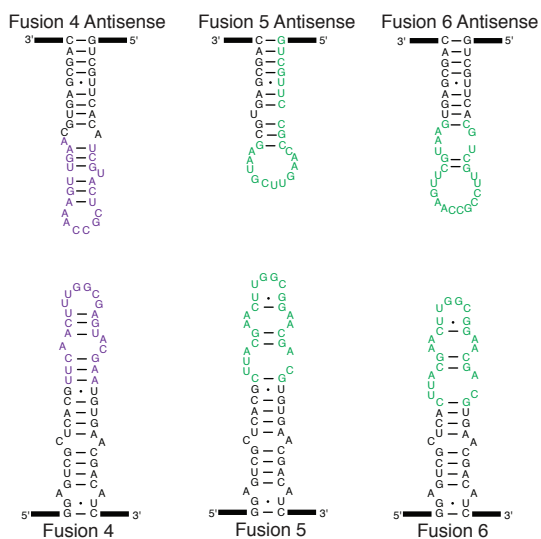

**Figure S3.** Predicted structures for fusions in Figure 3. Predicted MFE structures of the first hairpin of the chimeric attenuator and antisense for Fusions 4, 5 and 6. Purple and green colored bases represent sequence from the parent translational regulator (see Figure 3 for color code). Bases in black represent the wild type pT181 sequence.

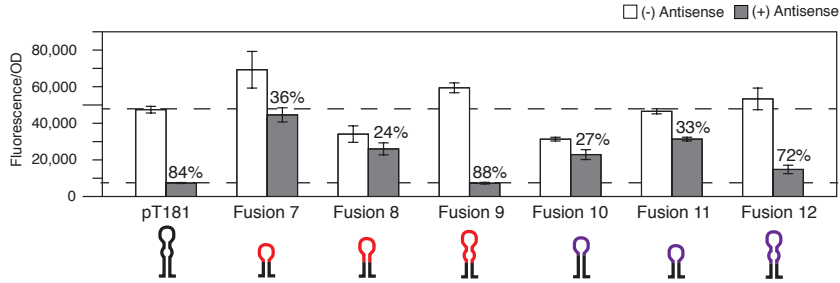

**Figure S4.** Testing the interior-loop design principle for loop-loop chimeric attenuators. Data complementary to Figures 2 and 3. Fusions 7, 8 and 9 were engineered using the pT181 position at A24 (Figure 3A) for the three fusion sequences of TransSysM (M1, M2 and M3 – see Figure 2). Fusions 10 and 11 were engineered using a combination of the top loop of the TransSysR hairpin and pT181 positions G26 and A24, respectively. Fusion 12 was engineered using a combination of the TransSysR fusion region in Figure 3 and pT181 position A24. Average *in vivo* fluorescence from cells with (grey) or without (white) cognate antisense RNA. Error bars represent the standard deviation of at least 5 independent transformations.

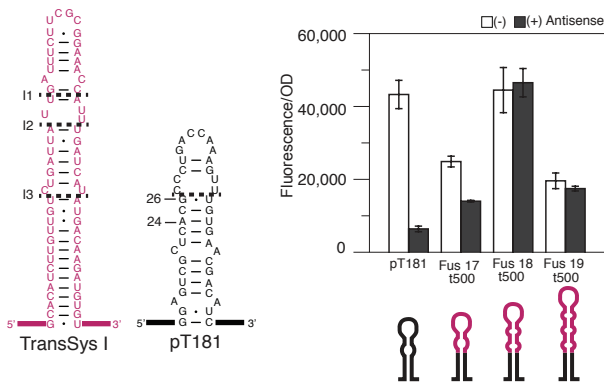

**Figure S5.** Chimeric attenuators based on TransSysI and pT181 position G26. Data complementary to Figure 4. Average *in vivo* fluorescence from cells with (black) and without (white) plasmids encoding cognate antisense RNA for each fusion. The t500 terminator was used for all chimeric antisense plasmids. Error bars represent the standard deviation of at least 5 independent transformations.

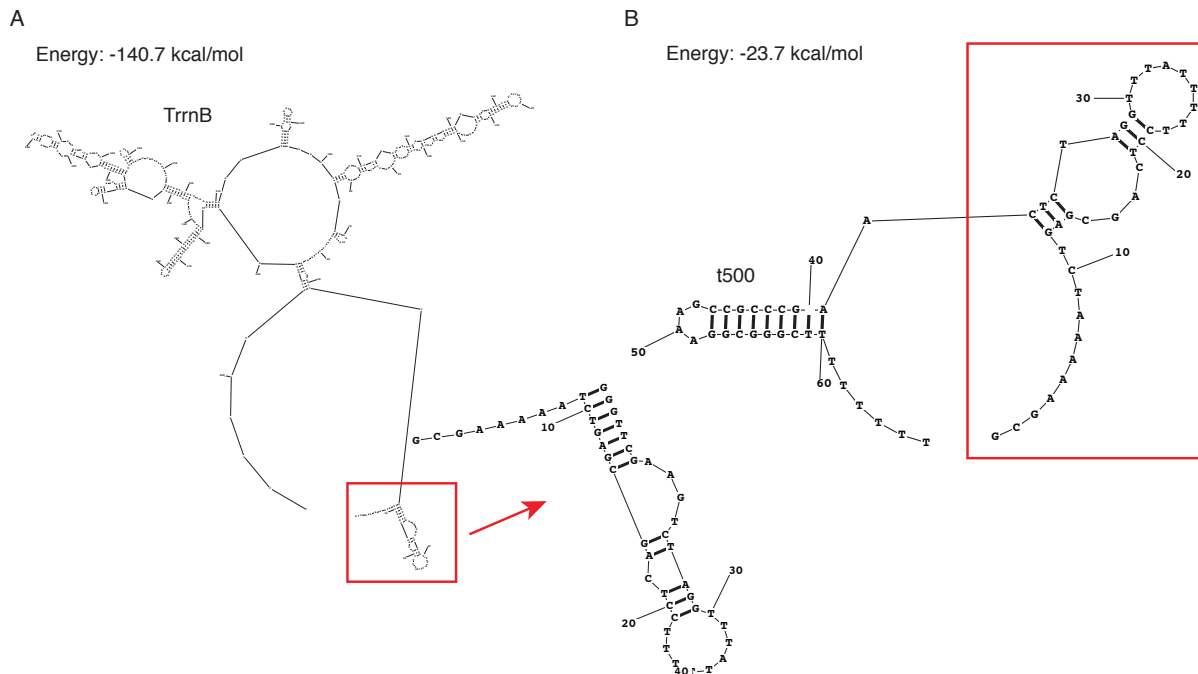

**Figure S6.** Linear antisense folding of Fusion 13 with TrrnB and t500 terminators. Predicted minimum free energy (MFE) structure of Fusion 13 antisense with (A) TrrnB and (B) t500; red box highlights the antisense sequence which is zoomed in an inset in (A).

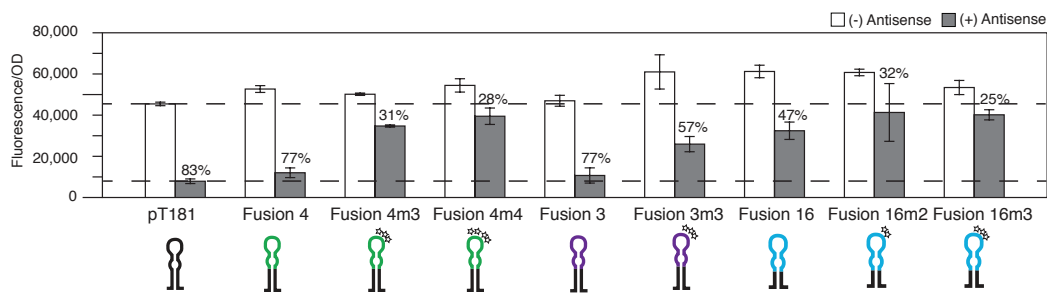

**Figure S7.** Representative set of chimera mutation failures. Data complementary to Figure 5. Average *in vivo* fluorescence from cells with (grey) and without (white) plasmids encoding cognate antisense RNA for each fusion. Error bars represent the standard deviation of at least 5 independent transformations.

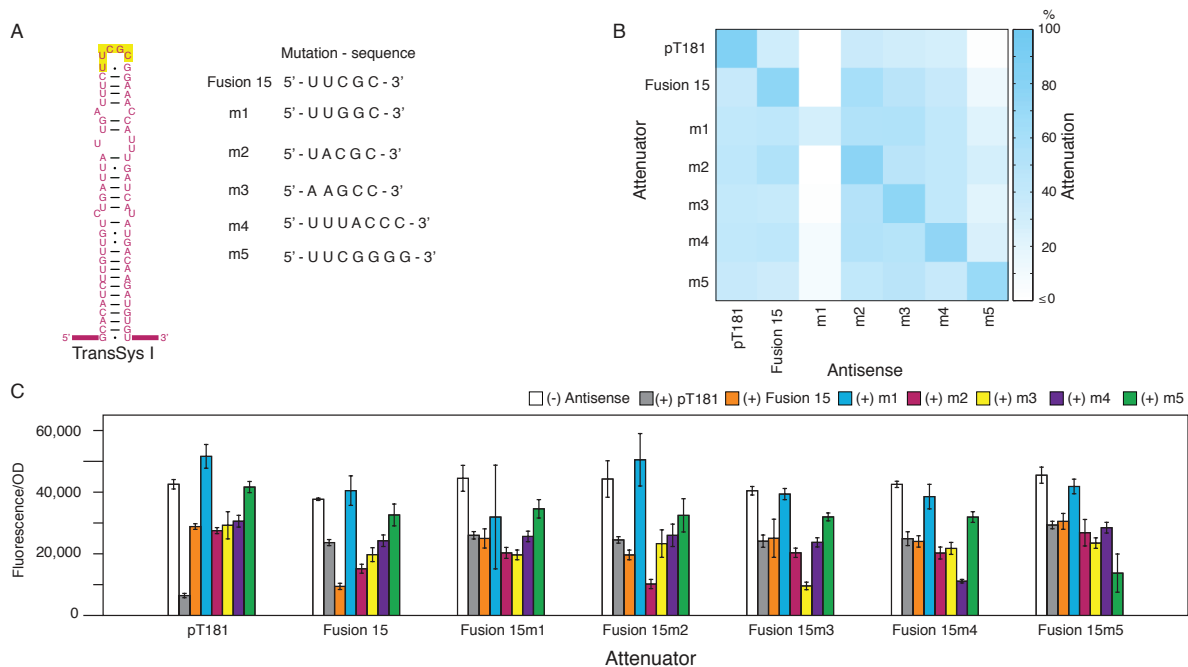

**Figure S8.** Mutations to Fusion 15. (A) Five previously reported mutations to the IS10 translational regulator (7) were applied to chimeric attenuator Fusion 15. Mutations were made by substituting the highlighted yellow sequence with sequences listed to the right. (B) 7x7 orthogonality matrix for the pT181 attenuator, Fusion 15, and the 5 mutants. The matrix shows all possible combinations of (antisense, attenuator) for the 7 attenuators tested. Attenuation % is represented by a color scale in which 100% is blue and less than or equal to 0% is white. (C) *In vivo* expression data used to calculate the matrix in part (B). White bars represent the average fluorescence/OD of cells without antisense and colored bars of cells with antisense according to the legend. Error bars represent standard deviations of at least 4 independent transformants.

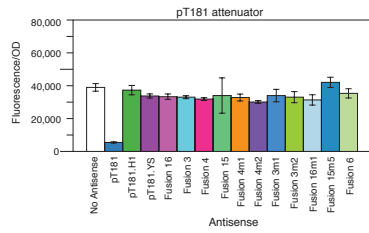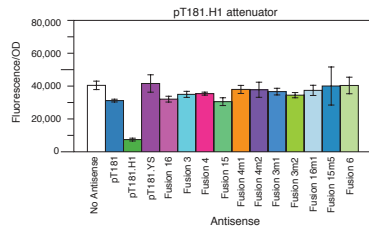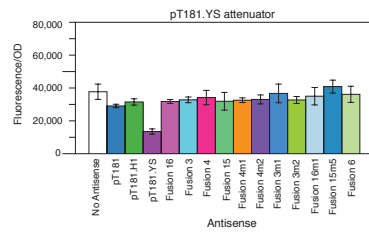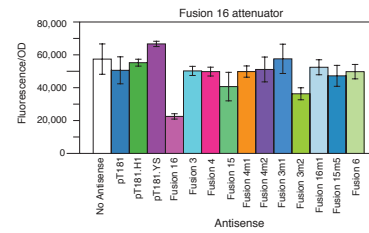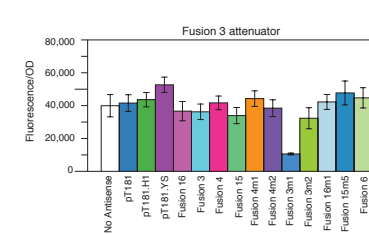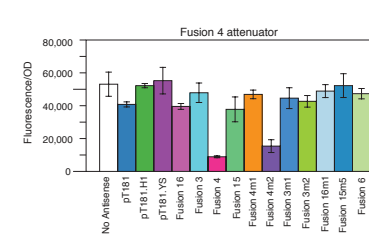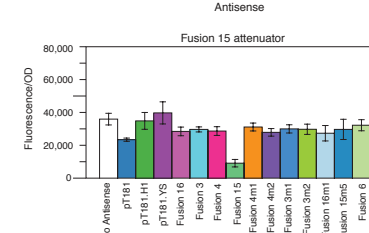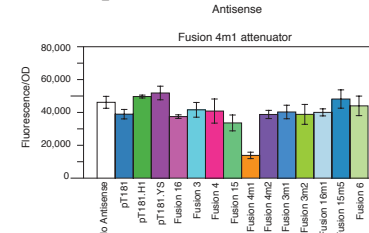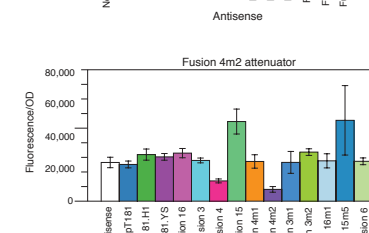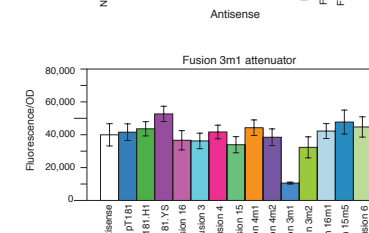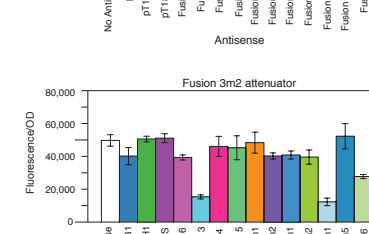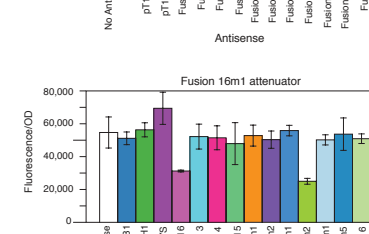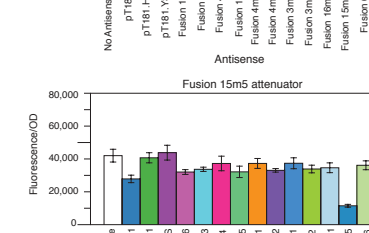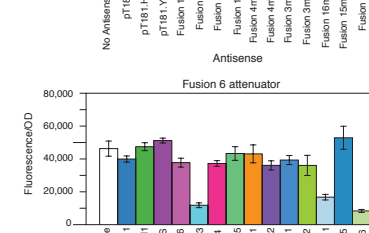



**Figure S9.** *In vivo* expression data used to calculate the 14x14 attenuation matrix found in Figure 6A. White bars represent the average fluorescence/OD of cells without antisense and colored bars of cells with antisense according to label on x-axis. Each plot represents a row of the 14x14 matrix in Figure 6A – i.e. attenuation for a single chimeric attenuator with different combinations of antisense RNA indicated on the x-axis. Error bars represent standard deviations of at least 5 independent transformants.

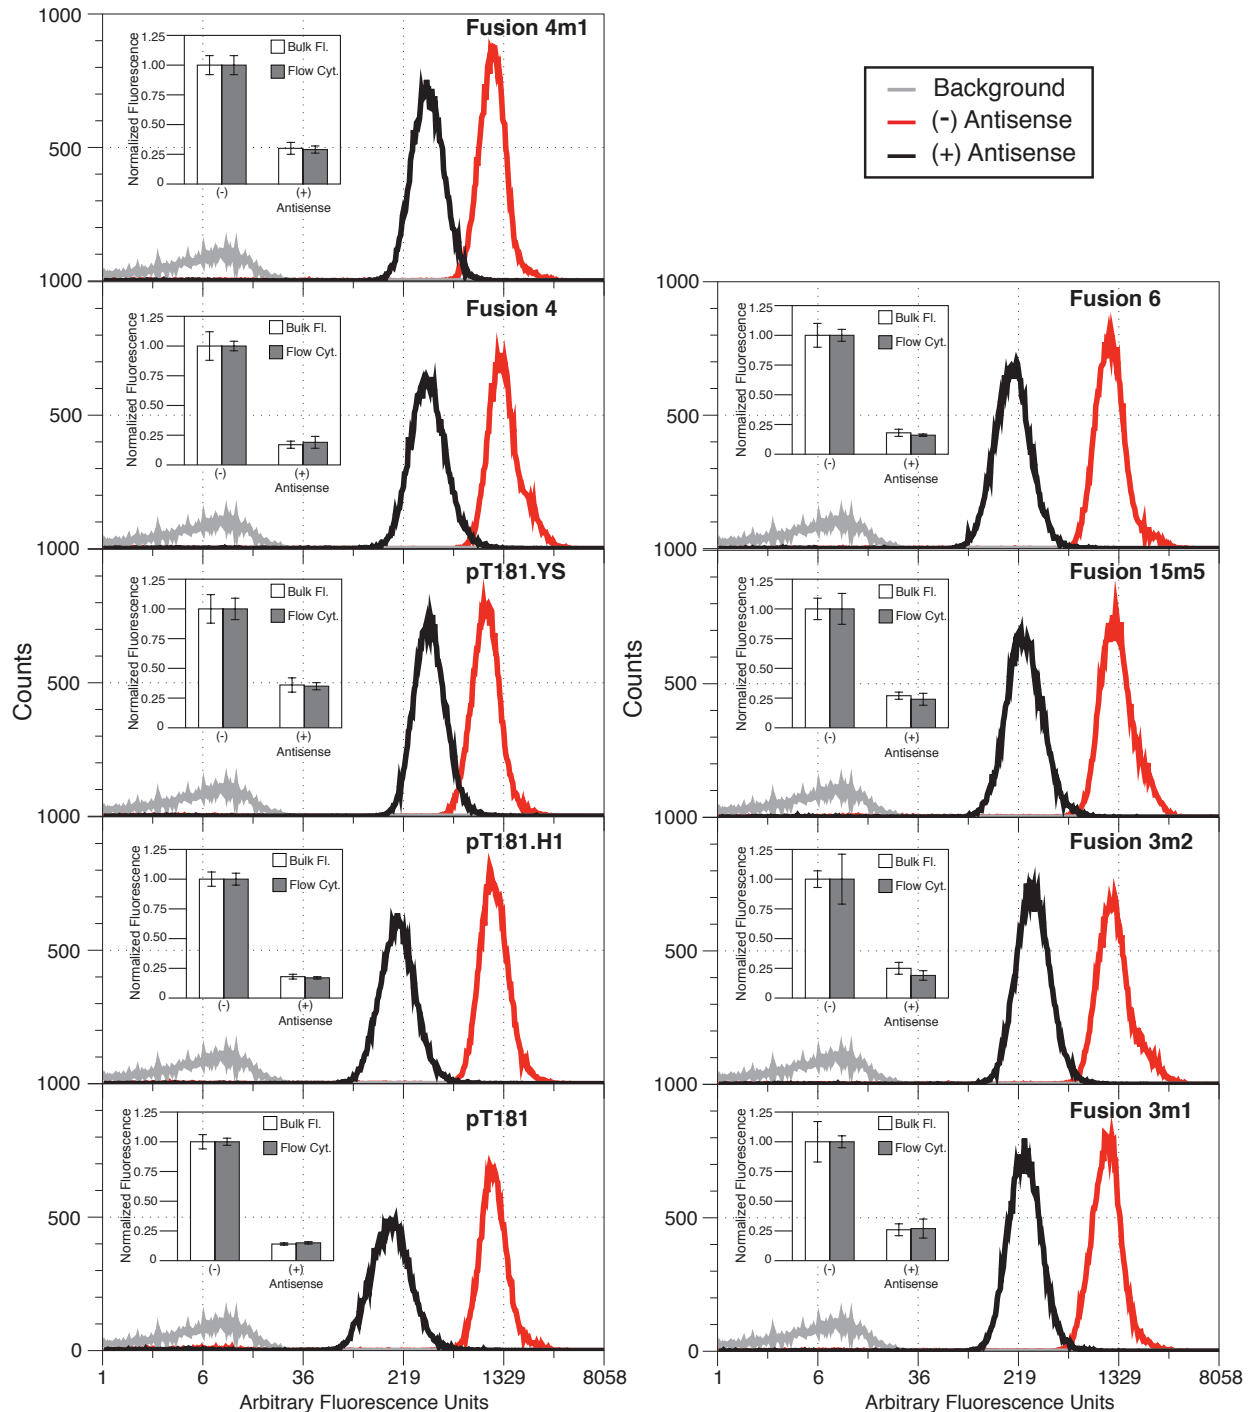

**Figure S10.** Representative flow cytometry data. Representative histograms for the eight attenuators found in the final orthogonality matrix and the pT181 attenuator. Red traces represent cells without (-) antisense, black traces represent cells with (+) cognate antisense, and grey traces represent the background fluorescence of cells not expressing SFGFP. Histograms are plotted on a log-scale in terms of relative intensity, but were calculated in relative channel number as described in the SI Materials and Methods above. Inset plots are a comparison between average bulk fluorescence (white bars) and mean fluorescence calculated from flow cytometry (grey bars) for the (-) and (+) cognate antisense conditions. Average fluorescence was normalized by the fluorescence observed without antisense for each attenuator. Error bars represent standard deviations of at least 3 independent transformants.

## References

7. Mutalik, V.K., Qi, L., Guimaraes, J.C., Lucks, J.B. and Arkin, A.P. (2012) Rationally designed families of orthogonal RNA regulators of translation. *Nat Chem Biol*, **8**, 447–454.
40. Lutz, R. and Bujard, H. (1997) Independent and tight regulation of transcriptional units in *Escherichia coli* via the LacR/O, the TetR/O and AraC/I1-I2 regulatory elements. *Nucleic Acids Res*, **25**, 1203–1210.
